# Supplementary material for: A tale of two metal ions: contrasting behaviors of high oxidation states of Cu and Mn in a bicarbonate–H2O2 system
Source: Royal Society of Chemistry journal article supplement (doi:10.1039/d0ew00910e), 2020-12-31
Supplement: d0ew00910e1.pdf [file d0ew00910e1.pdf]

Supporting Information

# A Tale of Two Metal Ions: Contrasting Behaviors of High Oxidation States of Cu and Mn in Bicarbonate-H<sub>2</sub>O<sub>2</sub> System

*Zhiwei Yang<sup>a,b</sup>, Xiaonan Tan<sup>a</sup>, Daojian Tang<sup>a</sup>, Jing Li<sup>\*b</sup>, Jiahai Ma<sup>\*a</sup>*

<sup>a</sup> School of Chemical Sciences, University of Chinese Academy of Sciences, Beijing 100049, P. R. China

<sup>b</sup> Chongqing Institute of Green and Intelligent Technology, Chinese Academy of Sciences, 100190, Beijing, P. R. China.

E-mail: [majia@ucas.ac.cn](mailto:majia@ucas.ac.cn)

**Table S1.** Comparison of the current AOPs for successful treatment for azo dyes in some recent literature.

| Ref.      | AOPs                                                                                                              | 100% Degradation Time | Azo dyes                                     |
|-----------|-------------------------------------------------------------------------------------------------------------------|-----------------------|----------------------------------------------|
| This work | metal ions intermediated bicarbonate-H <sub>2</sub> O <sub>2</sub> system                                         | 10 min                | congo red                                    |
| 1         | Adsorption                                                                                                        | 15 min                | methyl orange<br>orange II<br>congo red      |
| 2         | Adsorption                                                                                                        | 60 min                | reactive black 5<br>amaranth<br>acid red 183 |
| 3         | Synergistic Adsorption and Biodegradation                                                                         | 1400 min              | orange II                                    |
| 4         | Synergistic Adsorption and Photocatalysis                                                                         | 120 min               | congo red                                    |
| 5         | TiO <sub>2</sub> Photocatalysis                                                                                   | 180 min               | congo red                                    |
| 6         | Fe–Cr Codoped BaTiO <sub>3</sub> Photocatalysis                                                                   | 100 min               | methyl orange                                |
| 7         | Biodegradation                                                                                                    | 120 h                 | methyl orange<br>Ponceau S Red               |
| 8         | Bioelectrochemical System Integrated with a Membrane Biofilm Reactor                                              | days                  | acid orange                                  |
| 9         | Co Fenton-like system                                                                                             | 50 min                | sunset yellow                                |
| 10        | ozonation                                                                                                         | 30 min                | methyl orange                                |
| 11        | Catalytic reduction by Ag and Au nanoparticles stabilized on graphene oxide functionalized with PAMAM dendrimers) | 3 min                 | methyl orange<br>congo red                   |
| 12        | Reduction by mediated Sulfide                                                                                     | 50 min                | methyl orange                                |

## References.

1. M. Chaaban, H. El-Rassy, Nickel–Aluminum Oxide Aerogels: Super-adsorbents for Azo Dyes for Water Remediation. *ACS Omega*. 5 (2020) 27401-27412.
2. M. Vall, M. Strømme, O. Cheung, Amine-Modified Mesoporous Magnesium Carbonate as an Effective Adsorbent for Azo Dyes. *ACS Omega*. 4 (2019) 2973-2979.
3. M. Ahmad, M. Yousaf, A. Nasir, I. Ah. Bhatti, A. Mahmood, X. Fang, X. Jian, K. Kalantar-Zadeh, N. Mahmood, Porous Eleocharis@MnPE Layered Hybrid for Synergistic Adsorption and Catalytic Biodegradation of Toxic Azo Dyes from Industrial Wastewater. *Environ. Sci. Technol.* 53 (2019) 2161–2170.
4. X. Liu, T. Zhu, Y. Gong, Efficient Removal of Azo-Dyes in Aqueous Solution by CeB<sub>6</sub> Nanocrystals. *ACS Appl. Nano Mater.* 2 (2019) 5704–5712.
5. J. A. Bumpus, J. Tricker, K. Andrzejewski, H. Rhoads, M. Tatarko, Remediation of Water Contaminated with an Azo Dye: An Undergraduate Laboratory Experiment Utilizing an Inexpensive Photocatalytic Reactor. *J. Chem. Edu.* 76 (1999) 1680-1683.
6. I. C. Amaechi, A. H. Youssef, D. Rawach, J. P. Claverie, S. Sun, A. Ruediger, Ferroelectric Fe–Cr Codoped BaTiO<sub>3</sub> Nanoparticles for the Photocatalytic Oxidation of Azo Dyes. *ACS Appl. Nano Mater.* 2 (2019) 2890–2901.
7. D. Baena-Baldiris, A. Montes-Robledo, R. Baldiris-Avila, *Franconibacter sp.*, IMS: A New Strain in Decolorization and Degradation of Azo Dyes Ponceau S Red and Methyl Orange. *ACS Omega*. 5 (2020) 28146-28157.
8. Y. Pan, T. Zhu, Z. He, Enhanced Removal of Azo Dye by a Bioelectrochemical System Integrated with a Membrane Biofilm Reactor. *Ind. Eng. Chem. Res.* 57 (2018) 16433–16441.
9. Z. Li, L. Wang, M. Tian, Z. Li, Z. Yuan, C. Lu. Tris–Co(II)–H<sub>2</sub>O<sub>2</sub> System-Mediated Durative Hydroxyl Radical Generation for Efficient Anionic Azo Dye Degradation by Integrating Electrostatic Attraction. *ACS Omega*. 4 (2019) 21704-21711.
10. C. Feng , P. Diao, Nickel foam supported NiFe<sub>2</sub>O<sub>4</sub>-NiO hybrid: A novel 3D porous catalyst for efficient heterogeneous catalytic ozonation of azo dye and nitrobenzene. *Applied Surface Science* 541 (2021) 148683.

11. R. Rajesh, S. S. Kumarb, R. Venkatesan, Efficient degradation of azo dyes using Ag and Au nanoparticles stabilized on graphene oxide functionalized with PAMAM dendrimers. *New J. Chem.* 38 (2014) 1551-1558.
12. H. Zhao, S. Huang, W. Xu, Y. Wang, Y. Wang, C. He, Y. Mu, Undiscovered Mechanism for Pyrogenic Carbonaceous Matter-Mediated Abiotic Transformation of Azo Dyes by Sulfide. *Environ. Sci. Technol.* 53 (2019) 4397–4405.

Table S2. Characteristic peak wavelength of selected dyes. Conditions: dyes 0.02 mM, metal ions

| dyes                     | CR  | MBH | MO  | RB  | RhB | RR  |
|--------------------------|-----|-----|-----|-----|-----|-----|
| Characteristic peak (nm) | 494 | 665 | 465 | 545 | 554 | 543 |

0.1 mM,  $\text{HCO}_3^-$  40 mM,  $\text{H}_2\text{O}_2$  10 mM.

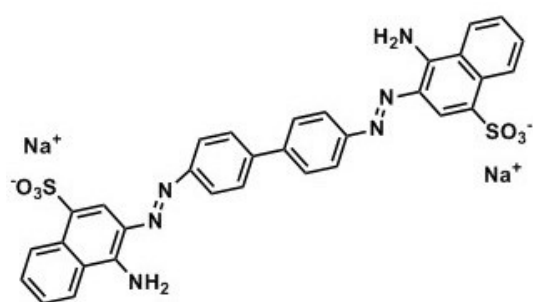

**CR**

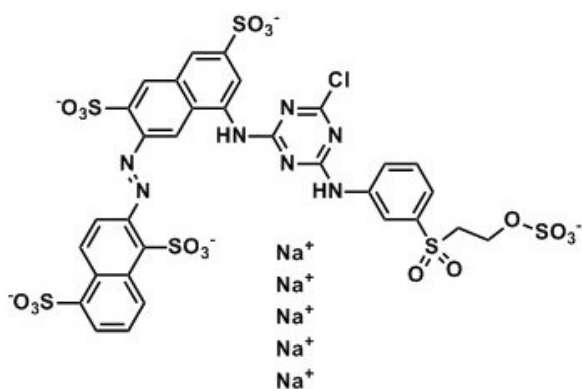

**RR**

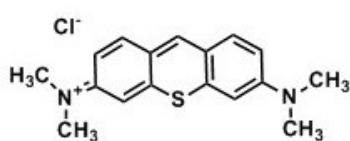

**MBH**

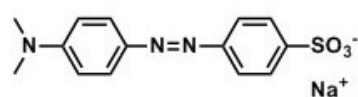

**MO**

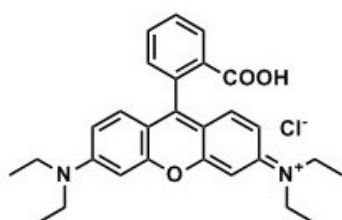

**RhB**

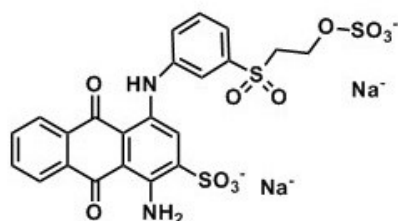

**RB**

Scheme S1. Structural formula of selected six dyes.

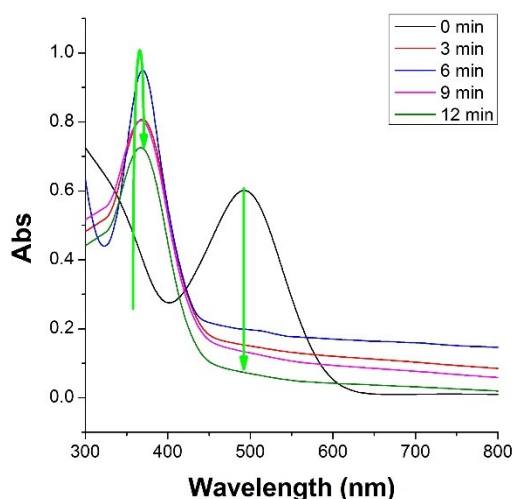

Figure S1. The Uv-Vis spectrum of CR during degradation. Conditions: CR 0.02 mM,  $\text{Cu}^{2+}$  0.1 mM,  $\text{HCO}_3^-$  40 mM,  $\text{H}_2\text{O}_2$  10 mM.

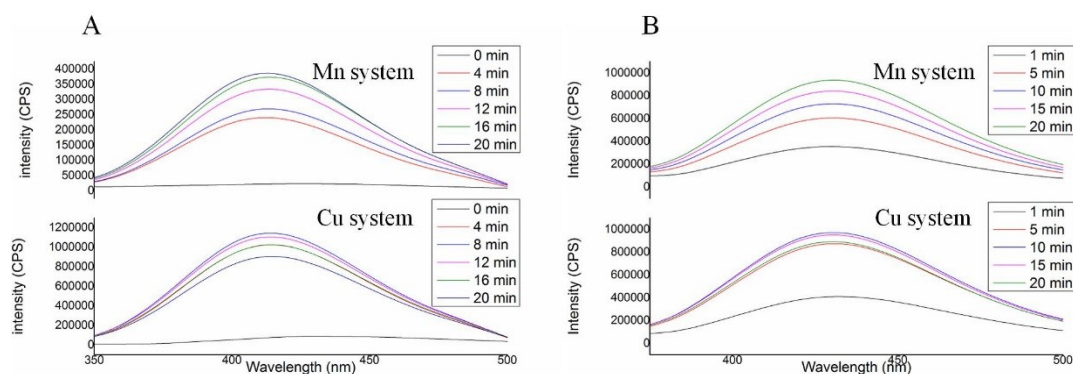

Figure S2. Fluorescence spectra analysis of (A) BA as fluorescent probe and (B) TA as fluorescent probe. Conditions:  $\text{Cu}^{2+}$  0.1 mM,  $\text{Mn}^{2+}$  0.1 mM,  $\text{HCO}_3^-$  40 mM,  $\text{H}_2\text{O}_2$  10 mM, BA 0.3 mM, TA 0.3mM. excitation wavelength 287 nm.

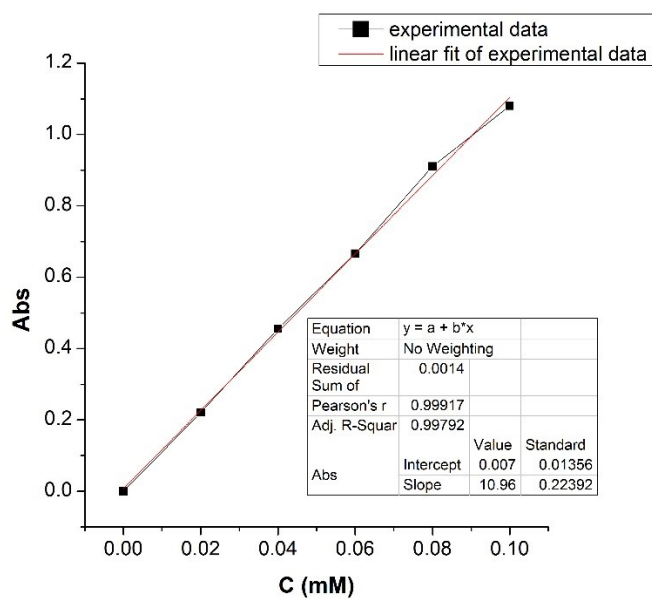

Figure S3. The linear relationship between Abs and concentration of Cu ( I ) by bathocuproine.

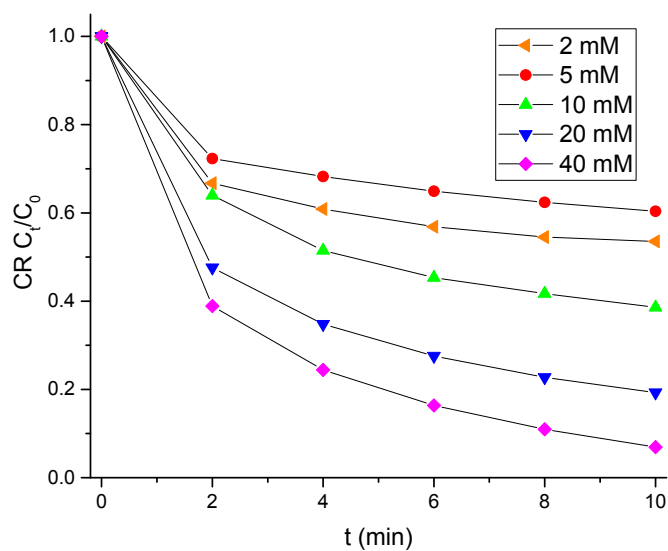

Figure S4. The dosage effect of o bicarbonate. Conditions: CR 0.02 mM,  $Cu^{2+}$  0.1 mM,  $H_2O_2$  10 mM.

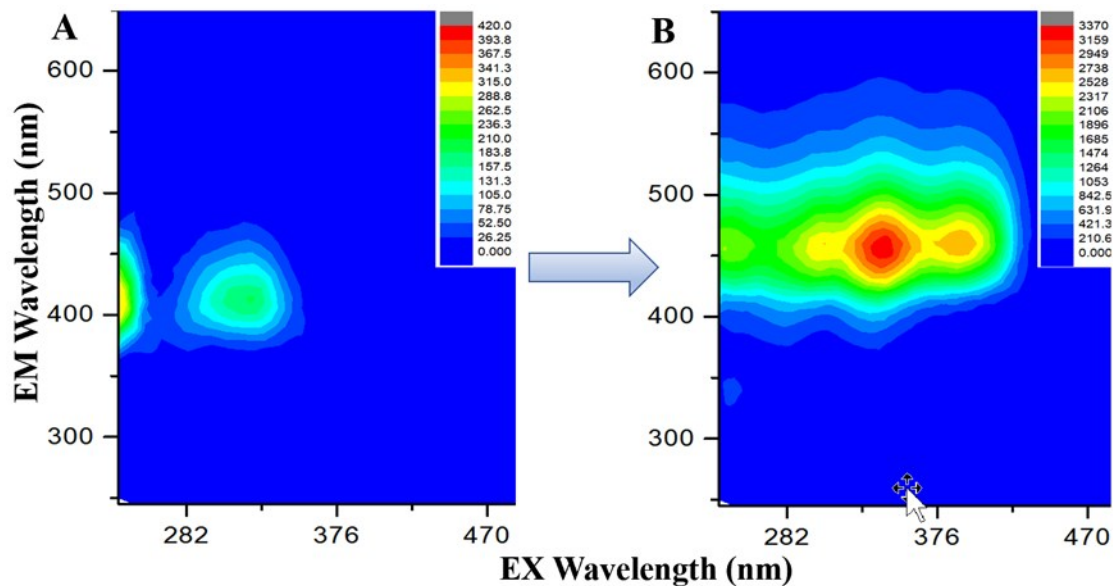

Figure S5. The 3D fluorescence spectra of CR. A: before the reaction; B: after the reaction. Conditions: CR 0.02 mM,  $Cu^{2+}$  0.1 mM,  $HCO_3^-$  40 mM,  $H_2O_2$  10 mM.
